# Supplementary material for: Alternative Evolutionary Pathways for Drug-Resistant Small Colony Variant Mutants in Staphylococcus aureus
Source: PubMed Central journal article supplement (PMC5478891; doi:10.1128/mbio.00358-17), 2017-06-20

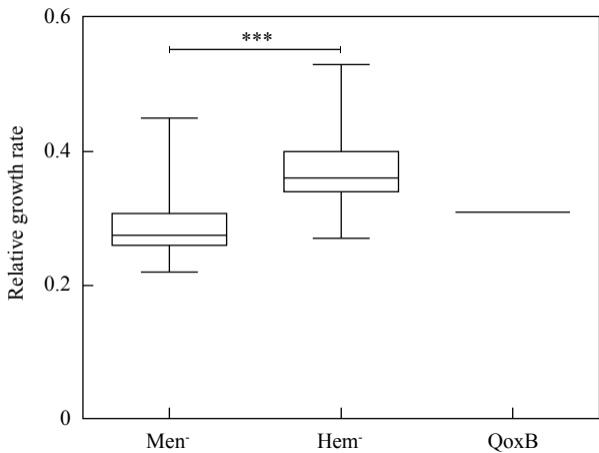

Supplement: mbo003173349sf1.pdf [file mbo003173349sf1.pdf]
