# Supplementary material for: Alternative Evolutionary Pathways for Drug-Resistant Small Colony Variant Mutants in Staphylococcus aureus
Source: PubMed Central journal article supplement (PMC5478891; doi:10.1128/mbio.00358-17), 2017-06-20
Supplement: mbo003173349st3.pdf [file mbo003173349st3.pdf]

**Table S3. Relative gene expression measured by qPCR, comparing the affect of SCV-suppressor mutations in *srrAB* with the affect of a deletion of *srrAB*.**

| Gene number, name          | Gene function             | mRNA level relative to SCV AH875<br>(log <sub>2</sub> ratio) ± S.D |                               |                                   |
|----------------------------|---------------------------|--------------------------------------------------------------------|-------------------------------|-----------------------------------|
|                            |                           | <i>srrA</i> M55I<br>(AH1208)                                       | <i>srrB</i> V420D<br>(AH1131) | $\Delta$ <i>srrAB</i><br>(AH1670) |
| SAOUHSC_00113, <i>adhE</i> | Alcohol dehydrogenase     | 2.84 ± 0.53                                                        | 2.73 ± 0.3                    | -1.64 ± 0.24                      |
| SAOUHSC_00187, <i>pflB</i> | Formate acetyltransferase | 3.13 ± 0.92                                                        | 2.9 ± 0.48                    | -3.72 ± 0.53                      |
